# Supplementary material
Source: publisher figshare collection journal article supplement (https://gsapubs.figshare.com/ndownloader/files/39640036)
Supplement: Supplementary file 1 [file 39640036]

## Sheet: Table 2
Table S2 Representative electron analyses of clinopyroxene (omphacite) in eclogite samples
sample.no	LH3-2						LH3-2			LH3-4
mineral	Cpx1	Cpx1	Cpx1	Cpx1	Cpx1	Cpx1	Cpx2	Cpx2	Cpx2	Cpx2	Cpx2	Cpx2
SiO2	54.57	55.335	54.562	54.85	55.358	55.052	55.792	55.557	55.346	55.506	55.725	55.403
TiO2	0.165	0.089	0.152	0.165	0.102	0.124	0.037	0.074	0.042	-	0.039	0.076
Al2O3	5.835	6.382	6.09	6.238	6.231	5.908	5.07	5.228	4.817	4.897	4.12	4.024
Cr2O3	0.028	-	0.01	0.042	-	0.019	0.189	0.038	0.031	0.048	0.034	0.019
FeO	7.978	8.003	8.301	7.93	7.906	7.897	5.893	5.896	6.473	6.778	7.467	7.291
MnO	0.026	0.041	0.042	0.039	0.041	0.077	-	0.041	0.028	0.004	0.021	0.059
MgO	10.676	10.633	10.783	10.539	10.736	11.283	12.308	12.551	12.861	11.909	12.2	11.918
CaO	16.542	15.754	16.216	15.889	16.161	16.918	17.552	18.037	18.585	17.13	16.731	16.571
Na2O	3.627	3.873	3.551	4.02	3.751	3.111	3.34	3.382	2.465	3.796	4.046	3.848
K2O	0.004	-	-	-	0.005	0.006	-	-	0.018	-	0.003	0.004
Total	99.451	100.11	99.707	99.712	100.291	100.395	100.181	100.804	100.666	100.068	100.386	99.213
Oxygens	6	6	6	6	6	6	6	6	6	6	6	6
Si	2.00668	2.03481	2.00639	2.01698	2.03566	2.02441	2.05162	2.04298	2.03522	2.0411	2.04915	2.03731
Ti	0.00456466	0.00246215	0.00420502	0.00456466	0.00282179	0.00343041	0.00102359	0.00204718	0.00116191	0	0.00107892	0.00210251
Al	0.252884	0.27659	0.263935	0.27035	0.270046	0.256048	0.219729	0.226577	0.208765	0.212232	0.178557	0.174397
Cr	0.000814062	0	0.000290736	0.00122109	0	0.000552399	0.00549492	0.0011048	0.000901283	0.00139553	0.000988504	0.000552399
Fe3+	0	0	0	0.000535444	0	0	0	0.0181178	0	0.0360729	0.0842516	0.0418777
Fe2+	0.244714	0.242941	0.253983	0.241619	0.239717	0.239586	0.177976	0.159259	0.195394	0.169824	0.142647	0.181941
Mn	0.000809811	0.00127701	0.00130816	0.00121472	0.00127701	0.00239829	0	0.00127701	0.000872104	0.000124586	0.000654078	0.00183765
Mg	0.58525	0.582892	0.591115	0.577739	0.588539	0.618525	0.674715	0.688036	0.70503	0.652842	0.668794	0.653335
Ca	0.651753	0.620706	0.638909	0.626025	0.636742	0.666568	0.691547	0.710656	0.732247	0.67492	0.6592	0.652896
Na	0.257924	0.272568	0.251886	0.284594	0.263675	0.218816	0.233857	0.235881	0.172505	0.267333	0.28503	0.273857
K	0.000187162	0	0	0	0.000231262	0.000277679	0	0	0.000828838	0	0.000139059	0.00018731
SUM	4.00558	4.03425	4.01202	4.02484	4.03871	4.03061	4.05596	4.08593	4.05292	4.05584	4.07049	4.0203
Jd	0.283534	0.305133	0.282765	0.31194	0.292837	0.247143	0.252708	0.230063	0.190666	0.245433	0.212637	0.250314
Ae	0	0	0	0.000588001	0	0	0	0.0191411	0	0.0382837	0.0892279	0.0451876
WEF	0.716466	0.694867	0.717235	0.687472	0.707163	0.752857	0.747292	0.750796	0.809334	0.716283	0.698135	0.704498
